# Supplementary material for: GC-MS Based Metabolite Profiling to Monitor Ripening-Specific Metabolites in Pineapple (Ananas comosus)
Source: PubMed Central journal article supplement (PMC7240947; doi:10.3390/metabo10040134), 2020-03-31

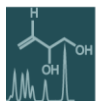

# Supplementary Materials

**Table S1.** Complete list of annotated metabolites with RSD<20% for sample preparation analysis

| No | Metabolite                 | RI*     | Quantitative m/z | Annotation                     |
|----|----------------------------|---------|------------------|--------------------------------|
| 1  | Propyleneglycol            | 1002.62 | 117              | GL-sciences library            |
| 2  | 2-Hydroxypyridine          | 1038.57 | 152              | GL-sciences library and NIST11 |
| 3  | Isoleucine                 | 1179.92 | 86               | GL-sciences library and NIST11 |
| 4  | Serine                     | 1262.86 | 116              | GL-sciences library and NIST11 |
| 5  | 2-Aminoethanol             | 1275.53 | 174              | GL-sciences library and NIST11 |
| 6  | Phosphate                  | 1282.02 | 299              | GL-sciences library and NIST11 |
| 7  | Threonine                  | 1300.99 | 117              | GL-sciences library and NIST11 |
| 8  | Glycine                    | 1316.35 | 174              | GL-sciences library and NIST11 |
| 9  | Glyceric acid              | 1340.02 | 147              | GL-sciences library and NIST11 |
| 10 | $\beta$ -Alanine           | 1436.77 | 174              | GL-sciences library            |
| 11 | Malic acid                 | 1497.79 | 147              | GL-sciences library and NIST11 |
| 12 | Meso erythritol            | 1523.37 | 217              | GL-sciences library and NIST11 |
| 13 | Pyroglutamic acid          | 1534.12 | 156              | GL-sciences library            |
| 14 | 4-Aminobutyric acid        | 1541.43 | 174              | GL-sciences library and NIST11 |
| 15 | Threonic acid              | 1576.53 | 147              | GL-sciences library and NIST11 |
| 16 | Xylose +Lyxose             | 1671.88 | 103              | GL-sciences library            |
| 17 | Xylose                     | 1678.62 | 103              | GL-sciences library and NIST11 |
| 18 | Lyxose                     | 1684.64 | 103              | GL-sciences library and NIST11 |
| 19 | Ribose                     | 1700.01 | 103              | GL-sciences library and NIST11 |
| 20 | Putrescine                 | 1757.13 | 174              | GL-sciences library and NIST11 |
| 21 | Xylonic acid               | 1793.27 | 292              | GL-sciences library            |
| 22 | Isocitric acid+Citric acid | 1839.77 | 273              | GL-sciences library and NIST11 |
| 23 | Quinic acid                | 1890.26 | 345              | GL-sciences library            |
| 24 | Psicose +Tagatose          | 1904.94 | 103              | GL-sciences library and NIST11 |
| 25 | Fructose                   | 1915.11 | 103              | GL-sciences library and NIST11 |
| 26 | Mannose                    | 1920.06 | 319              | GL-sciences library and NIST11 |
| 27 | Galactose                  | 1927.03 | 319              | GL-sciences library and NIST11 |
| 28 | Glucose                    | 1933.51 | 205              | GL-sciences library and NIST11 |
| 29 | Lysine                     | 1940.06 | 174              | GL-sciences library            |
| 30 | Galactose+Glucose          | 1953.11 | 205              | GL-sciences library            |
| 31 | Tyrosine                   | 1958.30 | 218              | GL-sciences library            |
| 32 | Sorbitol                   | 1976.31 | 217              | GL-sciences library and NIST11 |
| 33 | Galacturonic acid          | 1981.4  | 333              | GL-sciences library            |

|    |                      |         |     |                                |
|----|----------------------|---------|-----|--------------------------------|
| 34 | Galactitol           | 1984.89 | 217 | GL-sciences library            |
| 35 | Gluconic acid        | 2036.73 | 292 | GL-sciences library            |
| 36 | Glucarate            | 2059.15 | 333 | GL-sciences library and NIST11 |
| 37 | Inositol             | 2131.83 | 217 | GL-sciences library and NIST11 |
| 38 | 5-Hydroxy tryptamine | 2516.82 | 174 | GL-sciences library            |
| 39 | Sucrose              | 2709.32 | 363 | GL-sciences library and NIST11 |
| 40 | $\beta$ -Lactose     | 2773.11 | 217 | GL-sciences library and NIST11 |
| 41 | Trehalose            | 2814.14 | 361 | GL-sciences library            |
| 42 | Turanose             | 2830.42 | 217 | GL-sciences library            |
| 43 | Maltose              | 2856.24 | 361 | GL-sciences library and NIST11 |
| 44 | Gentiobiose          | 2888.12 | 204 | GL-sciences library and NIST11 |
| 45 | Maltitol             | 2936.32 | 204 | GL-sciences library            |
| 46 | Melibiose            | 2949.51 | 204 | GL-sciences library            |
| 47 | Raffinose            | 3511.31 | 217 | GL-sciences library            |

\*Retention indices (RI) were calculated using standard alkane mixture (C<sub>10</sub>-C<sub>40</sub>).

Peak annotation was as follows:

- Comparison of the retention indices (RI) and their mass spectra with GL-science library,
- 80% upwards matching to NIST11 library

**Table S2.** Complete list of annotated metabolites with RSD<20% for different parts analysis

| Crown |                            |         |                  |                                |
|-------|----------------------------|---------|------------------|--------------------------------|
| No    | Metabolite                 | RI*     | Quantitative m/z | Annotation                     |
| 1     | Alanine                    | 1107.12 | 116              | GL-sciences library and NIST11 |
| 2     | Valine                     | 1223.16 | 144              | GL-sciences library and NIST11 |
| 3     | Glyceraldehyde             | 1224.08 | 128              | GL-sciences library            |
| 4     | Leucine                    | 1279.57 | 158              | GL-sciences library and NIST11 |
| 5     | Isoleucine                 | 1301.65 | 158              | GL-sciences library and NIST11 |
| 6     | Proline                    | 1306.06 | 142              | GL-sciences library and NIST11 |
| 7     | Serine                     | 1370.36 | 204              | GL-sciences library and NIST11 |
| 8     | Threonine                  | 1398.02 | 218              | GL-sciences library and NIST11 |
| 9     | Malic acid                 | 1498.42 | 147              | GL-sciences library and NIST11 |
| 10    | Threitol                   | 1514.73 | 103              | GL-sciences library            |
| 11    | Methionine                 | 1530.29 | 176              | GL-sciences library            |
| 12    | 4-Aminobutyric acid        | 1541.53 | 174              | GL-sciences library and NIST11 |
| 13    | Threonic acid              | 1577.10 | 147              | GL-sciences library and NIST11 |
| 14    | Glutamic acid              | 1629.40 | 246              | GL-sciences library and NIST11 |
| 15    | Phenylalanine              | 1642.13 | 218              | GL-sciences library and NIST11 |
| 16    | Asparagine                 | 1683.54 | 116              | GL-sciences library and NIST11 |
| 17    | Arabionose                 | 1685.33 | 103              | GL-sciences library and NIST11 |
| 18    | Xylulose+Ribulose          | 1700.41 | 147              | GL-sciences library            |
| 19    | Ribose                     | 1700.79 | 103              | GL-sciences library and NIST11 |
| 20    | Rhamnose                   | 1745.06 | 117              | GL-sciences library and NIST11 |
| 21    | Arabitol                   | 1746.41 | 217              | GL-sciences library            |
| 22    | Putrescine                 | 1757.17 | 174              | GL-sciences library and NIST11 |
| 23    | Glutamine                  | 1785.64 | 156              | GL-sciences library            |
| 24    | Xylonic acid               | 1793.58 | 292              | GL-sciences library            |
| 25    | Shikimic acid              | 1821.25 | 204              | GL-sciences library            |
| 26    | Isocitric acid+Citric acid | 1840.79 | 273              | GL-sciences library and NIST11 |
| 27    | Adenine                    | 1884.76 | 264              | GL-sciences library            |
| 28    | Quinic acid                | 1891.18 | 345              | GL-sciences library            |
| 29    | Psicose +Tagatose          | 1905.71 | 306              | GL-sciences library and NIST11 |
| 30    | Sorbose                    | 1906.61 | 103              | GL-sciences library and NIST11 |
| 31    | Fructose                   | 1816.49 | 103              | GL-sciences library and NIST11 |
| 32    | Galactose                  | 1927.86 | 205              | GL-sciences library and NIST11 |
| 33    | Tyramine                   | 1932.78 | 174              | GL-sciences library            |
| 34    | Glucose                    | 1935.59 | 319              | GL-sciences library and NIST11 |

| 35           | Allose +Mannose      | 1936.33 | 319              | GL-sciences library            |
|--------------|----------------------|---------|------------------|--------------------------------|
| 36           | Lysine               | 1941.06 | 174              | GL-sciences library and NIST11 |
| 37           | Mannitol             | 1968.32 | 319              | GL-sciences library and NIST11 |
| 38           | Sorbitol             | 1975.83 | 147              | GL-sciences library and NIST11 |
| 39           | Galacturonic acid    | 1982.28 | 333              | GL-sciences library            |
| 40           | Glucarate            | 2003.34 | 147              | GL-sciences library and NIST11 |
| 41           | Gluconic acid        | 2039.82 | 333              | GL-sciences library            |
| 42           | Inositol             | 2132.12 | 217              | GL-sciences library and NIST11 |
| 43           | Guanine              | 2146.03 | 352              | GL-sciences library            |
| 44           | Tryptophan           | 2217.38 | 218              | GL-sciences library            |
| 45           | Spermidine           | 2284.89 | 144              | GL-sciences library            |
| 46           | Fructose 6-phosphate | 2357.09 | 315              | GL-sciences library            |
| 47           | Sucrose              | 2707.26 | 361              | GL-sciences library and NIST11 |
| 48           | $\beta$ -Lactose     | 2780.38 | 117              | GL-sciences library and NIST11 |
| 49           | Trehalose            | 2816.61 | 361              | GL-sciences library            |
| 50           | Lactitol             | 2840.38 | 361              | GL-sciences library            |
| 51           | Gentiobiose          | 2890.84 | 204              | GL-sciences library and NIST11 |
| 52           | Maltitol             | 2950.89 | 204              | GL-sciences library            |
| 53           | Galactinol           | 3076.88 | 204              | GL-sciences library            |
| 54           | Raffinose            | 3503.75 | 361              | GL-sciences library            |
| <b>Flesh</b> |                      |         |                  |                                |
| No           | Metabolite           | RI*     | Quantitative m/z | Annotation                     |
| 1            | Propyleneglycol      | 1002.9  | 117              | GL-sciences library            |
| 2            | Alanine              | 1107.12 | 116              | GL-sciences library and NIST11 |
| 3            | Valine               | 1223.16 | 144              | GL-sciences library and NIST11 |
| 4            | Proline              | 1306.06 | 142              | GL-sciences library and NIST11 |
| 5            | Serine               | 1370.36 | 204              | GL-sciences library and NIST11 |
| 6            | Malic acid           | 1498.42 | 147              | GL-sciences library and NIST11 |
| 7            | Methionine           | 1530.29 | 176              | GL-sciences library            |
| 8            | 4-Aminobutyric acid  | 1541.53 | 174              | GL-sciences library and NIST11 |
| 9            | Threonic acid        | 1577.10 | 147              | GL-sciences library            |
| 10           | Xylose +Lyxose       | 1672.56 | 103              | GL-sciences library            |
| 11           | Lyxose               | 1679.35 | 103              | GL-sciences library and NIST11 |
| 12           | Asparagine           | 1683.54 | 116              | GL-sciences library and NIST11 |
| 13           | Arabionose           | 1685.33 | 103              | GL-sciences library and NIST11 |
| 14           | Xylulose+Ribulose    | 1700.41 | 147              | GL-sciences library            |
| 15           | Ribose               | 1700.79 | 103              | GL-sciences library and NIST11 |

| 16          | Xylonic acid               | 1793.58    | 292                     | GL-sciences library            |
|-------------|----------------------------|------------|-------------------------|--------------------------------|
| 17          | Shikimic acid              | 1821.25    | 204                     | GL-sciences library            |
| 18          | Isocitric acid+Citric acid | 1840.79    | 273                     | GL-sciences library and NIST11 |
| 19          | Quinic acid                | 1891.18    | 345                     | GL-sciences library            |
| 20          | Psicose +Tagatose          | 1905.71    | 306                     | GL-sciences library and NIST11 |
| 21          | Sorbose                    | 1906.61    | 103                     | GL-sciences library and NIST11 |
| 22          | Fructose                   | 1816.49    | 103                     | GL-sciences library and NIST11 |
| 23          | Mannose                    | 1921.10    | 319                     | GL-sciences library and NIST11 |
| 24          | Galactose                  | 1927.86    | 205                     | GL-sciences library and NIST11 |
| 25          | Tyramine                   | 1932.78    | 174                     | GL-sciences library            |
| 26          | Glucose                    | 1935.59    | 319                     | GL-sciences library and NIST11 |
| 27          | Allose +Mannose            | 1936.33    | 319                     | GL-sciences library            |
| 28          | Galactose+Glucose          | 1954.48    | 319                     | GL-sciences library            |
| 29          | Sorbitol                   | 1975.83    | 147                     | GL-sciences library and NIST11 |
| 30          | Glucarate                  | 2003.34    | 147                     | GL-sciences library and NIST11 |
| 31          | Gluconic acid              | 2039.82    | 333                     | GL-sciences library            |
| 32          | 5-Hydroxy tryptamine       | 2516.25    | 174                     | GL-sciences library            |
| 33          | Sucrose                    | 2707.26    | 361                     | GL-sciences library and NIST11 |
| 34          | $\beta$ -Lactose           | 2780.38    | 117                     | GL-sciences library and NIST11 |
| 35          | Trehalose                  | 2816.61    | 361                     | GL-sciences library            |
| 36          | Lactitol                   | 2840.38    | 361                     | GL-sciences library            |
| 37          | Maltose                    | 2858.24    | 361                     | GL-sciences library and NIST11 |
| 38          | Maltitol                   | 2950.89    | 204                     | GL-sciences library            |
| 39          | Melibiose                  | 2950.89    | 204                     | GL-sciences library            |
| 40          | Galactinol                 | 3076.88    | 204                     | GL-sciences library            |
| 41          | Raffinose                  | 3503.75    | 361                     | GL-sciences library            |
| 42          | Paeoniflorin               | 3514.07    | 217                     | GL-sciences library            |
| 43          | Guanine                    | 2146.03    | 352                     | GL-sciences library and NIST11 |
| 44          | Inositol                   | 2132.12    | 217                     | GL-sciences library and NIST11 |
| <b>Peel</b> |                            |            |                         |                                |
| <b>No</b>   | <b>Metabolite</b>          | <b>RI*</b> | <b>Quantitative m/z</b> | <b>Annotation</b>              |
| 1           | Propyleneglycol            | 1002.9     | 117                     | GL-sciences library            |
| 2           | Alanine                    | 1107.12    | 116                     | GL-sciences library and NIST11 |
| 3           | Valine                     | 1223.16    | 144                     | GL-sciences library and NIST11 |
| 4           | Proline                    | 1306.06    | 142                     | GL-sciences library and NIST11 |
| 5           | Serine                     | 1370.36    | 204                     | GL-sciences library and NIST11 |
| 6           | Malic acid                 | 1498.42    | 147                     | GL-sciences library and NIST11 |

|    |                            |         |     |                                |
|----|----------------------------|---------|-----|--------------------------------|
| 7  | Methionine                 | 1530.29 | 176 | GL-sciences library            |
| 8  | 4-Aminobutyric acid        | 1541.53 | 174 | GL-sciences library and NIST11 |
| 9  | Threonic acid              | 1577.10 | 147 | GL-sciences library            |
| 10 | Xylose +Lyxose             | 1672.56 | 103 | GL-sciences library            |
| 11 | Lyxose                     | 1679.35 | 103 | GL-sciences library and NIST11 |
| 12 | Asparagine                 | 1683.54 | 116 | GL-sciences library and NIST11 |
| 13 | Arabionose                 | 1685.33 | 103 | GL-sciences library and NIST11 |
| 14 | Xylulose+Ribulose          | 1700.41 | 147 | GL-sciences library            |
| 15 | Ribose                     | 1700.79 | 103 | GL-sciences library and NIST11 |
| 16 | Rhamnose                   | 1745.06 | 117 | GL-sciences library and NIST11 |
| 17 | Arabitol                   | 1746.41 | 217 | GL-sciences library            |
| 18 | Glutamine                  | 1785.64 | 156 | GL-sciences library            |
| 19 | Xylonic acid               | 1793.58 | 292 | GL-sciences library            |
| 20 | Shikimic acid              | 1821.25 | 204 | GL-sciences library            |
| 21 | Isocitric acid+Citric acid | 1840.79 | 273 | GL-sciences library and NIST11 |
| 22 | Quinic acid                | 1891.18 | 345 | GL-sciences library            |
| 23 | Psicose +Tagatose          | 1905.71 | 306 | GL-sciences library            |
| 24 | Sorbose                    | 1906.61 | 103 | GL-sciences library and NIST11 |
| 25 | Fructose                   | 1816.49 | 103 | GL-sciences library and NIST11 |
| 26 | Mannose                    | 1921.10 | 319 | GL-sciences library and NIST11 |
| 27 | Galactose                  | 1927.86 | 205 | GL-sciences library and NIST11 |
| 28 | Tyramine                   | 1932.78 | 174 | GL-sciences library            |
| 29 | Glucose                    | 1935.59 | 319 | GL-sciences library and NIST11 |
| 30 | Allose +Mannose            | 1936.33 | 319 | GL-sciences library            |
| 31 | Galactose+Glucose          | 1954.48 | 319 | GL-sciences library            |
| 32 | Mannitol                   | 1968.32 | 319 | GL-sciences library and NIST11 |
| 33 | Sorbitol                   | 1975.83 | 147 | GL-sciences library and NIST11 |
| 34 | Galacturonic acid          | 1982.28 | 333 | GL-sciences library            |
| 35 | Glucarate                  | 2003.34 | 147 | GL-sciences library and NIST11 |
| 36 | Gluconic acid              | 2039.82 | 333 | GL-sciences library            |
| 37 | Inositol                   | 2132.12 | 217 | GL-sciences library and NIST11 |
| 38 | Guanine                    | 2146.03 | 352 | GL-sciences library and NIST11 |
| 39 | Fructose 6-phosphate       | 2357.09 | 315 | GL-sciences library            |
| 40 | 5-Hydroxy tryptamine       | 2516.25 | 174 | GL-sciences library            |
| 41 | Sucrose                    | 2707.26 | 361 | GL-sciences library and NIST11 |
| 42 | $\beta$ -Lactose           | 2780.38 | 117 | GL-sciences library and NIST11 |
| 43 | Trehalose                  | 2816.61 | 361 | GL-sciences library            |
| 44 | Lactitol                   | 2840.38 | 361 | GL-sciences library            |

|    |             |         |     |                                |
|----|-------------|---------|-----|--------------------------------|
| 45 | Maltose     | 2858.24 | 361 | GL-sciences library and NIST11 |
| 46 | Gentiobiose | 2890.84 | 204 | GL-sciences library and NIST11 |
| 47 | Maltitol    | 2950.89 | 204 | GL-sciences library            |
| 48 | Melibiose   | 2950.89 | 204 | GL-sciences library            |
| 49 | Galactinol  | 3076.88 | 204 | GL-sciences library            |
| 50 | Raffinose   | 3503.75 | 361 | GL-sciences library            |

\*Retention indices (RI) were calculated using standard alkane mixture (C<sub>10</sub>-C<sub>40</sub>).

Peak annotation was as follows:

- Comparison of the retention indices (RI) and their mass spectra with GL-science library,
- 80% upwards matching to NIST11 library

**Table S3.** Complete list of annotated metabolites with RSD<20% for ripening process analysis

\* = metabolites that only present in either crown, flesh, or peel part

| Crown |                            |         |                  |                                |
|-------|----------------------------|---------|------------------|--------------------------------|
| No    | Metabolite                 | RI*     | Quantitative m/z | Annotation                     |
| 1     | 2-Aminoethanol             | 1275.61 | 174              | GL-sciences library and NIST11 |
| 2     | 2-Hydroxypyridine          | 1038.83 | 152              | GL-sciences library and NIST11 |
| 3     | 4-Aminobutyric acid        | 1541.90 | 174              | GL-sciences library and NIST11 |
| 4     | Alanine                    | 1107.02 | 116              | GL-sciences library and NIST11 |
| 5     | Arabionose                 | 1685.38 | 103              | GL-sciences library and NIST11 |
| 6     | Ascorbic acid*             | 1975.45 | 319              | GL-sciences library            |
| 7     | Asparagine                 | 1683.48 | 116              | GL-sciences library and NIST11 |
| 8     | $\beta$ -Lactose           | 2773.80 | 204              | GL-sciences library and NIST11 |
| 9     | Chlorogenic acid*          | 3169.11 | 345              | GL-sciences library            |
| 10    | Fructose 6-phosphate       | 2371.14 | 387              | GL-sciences library            |
| 11    | Fructose                   | 1915.19 | 103              | GL-sciences library and NIST11 |
| 12    | Galactose                  | 1927.13 | 309              | GL-sciences library and NIST11 |
| 13    | Galactose+Glucose          | 1953.42 | 319              | GL-sciences library            |
| 14    | Galacturonic acid          | 1981.79 | 333              | GL-sciences library            |
| 15    | Gentiobiose                | 2889.32 | 204              | GL-sciences library and NIST11 |
| 16    | Glucarate                  | 2059.52 | 333              | GL-sciences library and NIST11 |
| 17    | Glucose                    | 1933.45 | 319              | GL-sciences library and NIST11 |
| 18    | Glutamic acid              | 1629.50 | 246              | GL-sciences library and NIST11 |
| 19    | Glutamine*                 | 1785.77 | 156              | GL-sciences library            |
| 20    | Glyceric acid              | 1340.15 | 147              | GL-sciences library and NIST11 |
| 21    | Glycine                    | 1316.47 | 174              | GL-sciences library and NIST11 |
| 22    | Inositol                   | 2132.57 | 217              | GL-sciences library and NIST11 |
| 23    | Isocitric acid+Citric acid | 1841.85 | 273              | GL-sciences library and NIST11 |
| 24    | Isoleucine                 | 1301.52 | 158              | GL-sciences library and NIST11 |
| 25    | Leucine*                   | 1279.71 | 158              | GL-sciences library and NIST11 |
| 26    | Lysine                     | 1940.35 | 174              | GL-sciences library            |
| 27    | Lyxose                     | 1685.35 | 103              | GL-sciences library and NIST11 |
| 28    | Malic acid                 | 1498.61 | 147              | GL-sciences library and NIST11 |
| 29    | Maltitol                   | 2936.87 | 204              | GL-sciences library            |
| 30    | Mannitol                   | 1967.73 | 319              | GL-sciences library and NIST11 |
| 31    | Melibiose                  | 2949.37 | 361              | GL-sciences library            |
| 32    | Meso erythritol            | 1523.81 | 147              | GL-sciences library and NIST11 |
| 33    | N-Acetyl glucosamine*      | 2118.52 | 147              | GL-sciences library and NIST11 |



| 34           | Oxalacetic acid+Pyruvate | 1050.97 | 174              | GL-sciences library                  |
|--------------|--------------------------|---------|------------------|--------------------------------------|
| 35           | Phenylalanine            | 1642.44 | 218              | GL-sciences library and NIST11       |
| 36           | Phosphate                | 1282.05 | 299              | GL-sciences library and NIST11       |
| 37           | Proline                  | 1306.0  | 142              | GL-sciences library and NIST11       |
| 38           | Psicose+Tagatose         | 1905.19 | 103              | GL-sciences library and NIST11       |
| 39           | Putrescine*              | 1757.65 | 174              | GL-sciences library and NIST11       |
| 40           | Quinic acid              | 1890.97 | 345              | GL-sciences library                  |
| 41           | Raffinose                | 3500.23 | 361              | GL-sciences library                  |
| 42           | Rhamnose                 | 1744.84 | 117              | GL-sciences library and NIST11       |
| 43           | Ribitol                  | 1752.37 | 217              | GL-sciences library, NIST11, and STD |
| 44           | Ribose                   | 1700.54 | 103              | GL-sciences library and NIST11       |
| 45           | Serine                   | 1262.93 | 116              | GL-sciences library and NIST11       |
| 46           | Sucrose                  | 2704.68 | 361              | GL-sciences library and NIST11       |
| 47           | Threitol*                | 1515.11 | 217              | GL-sciences library                  |
| 48           | Threonic acid            | 1577.02 | 147              | GL-sciences library and NIST11       |
| 49           | Threonine                | 1397.86 | 218              | GL-sciences library and NIST11       |
| 50           | Trehalose                | 2814.93 | 361              | GL-sciences library                  |
| 51           | Tryptophan               | 2219.10 | 218              | GL-sciences library                  |
| 52           | Tyrosine                 | 1958.71 | 218              | GL-sciences library                  |
| 53           | Uric acid*               | 2127.02 | 441              | GL-sciences library*                 |
| 54           | Valine                   | 1223.4  | 144              | GL-sciences library and NIST11       |
| 55           | Xylonic acid             | 1793.15 | 292              | GL-sciences library                  |
| 56           | Xylose                   | 1679.15 | 103              | GL-sciences library and NIST11       |
| <b>Flesh</b> |                          |         |                  |                                      |
| No           | Metabolite               | RI*     | Quantitative m/z | Annotation                           |
| 1            | 2-Aminoethanol           | 1275.39 | 174              | GL-sciences library and NIST11       |
| 2            | 4-Aminobutyric acid      | 1541.37 | 174              | GL-sciences library and NIST11       |
| 3            | 5-Hydroxy tryptamine*    | 2517.11 | 174              | GL-sciences library                  |
| 4            | Alanine                  | 1371.36 | 188              | GL-sciences library and NIST11       |
| 5            | Aspartic acid            | 1530.54 | 232              | GL-sciences library                  |
| 6            | $\beta$ -Lactose         | 2773.87 | 204              | GL-sciences library and NIST11       |
| 7            | Fructose                 | 1915.21 | 103              | GL-sciences library and NIST11       |
| 8            | Galactinol               | 3075.23 | 204              | GL-sciences library                  |
| 9            | Galactose                | 1927.03 | 319              | GL-sciences library and NIST11       |
| 10           | Galactose+Glucose        | 1953.44 | 319              | GL-sciences library                  |
| 11           | Galacturonic acid        | 1981.75 | 147              | GL-sciences library                  |

|             |                            |         |     |                                      |
|-------------|----------------------------|---------|-----|--------------------------------------|
| 12          | Gentiobiose                | 2888.76 | 204 | GL-sciences library and NIST11       |
| 13          | Glucarate                  | 2058.66 | 204 | GL-sciences library and NIST11       |
| 14          | Gluconic acid              | 2035.99 | 147 | GL-sciences library                  |
| 15          | Glucose                    | 1933.95 | 319 | GL-sciences library and NIST11       |
| 16          | Glutamic acid              | 1629.04 | 246 | GL-sciences library and NIST11       |
| 17          | Glycine                    | 1316.22 | 174 | GL-sciences library and NIST11       |
| 18          | Inositol                   | 2131.83 | 217 | GL-sciences library, NIST11, and STD |
| 19          | Isocitric acid+Citric acid | 1840.31 | 273 | GL-sciences library and NIST11       |
| 20          | Lysine                     | 1939.74 | 174 | GL-sciences library                  |
| 21          | Lyxose                     | 1684.88 | 103 | GL-sciences library and NIST11       |
| 22          | Malic acid                 | 1497.61 | 147 | GL-sciences library and NIST11       |
| 23          | Maltitol                   | 2936.84 | 204 | GL-sciences library                  |
| 24          | Maltose                    | 2856.61 | 361 | GL-sciences library and NIST11       |
| 25          | Melezitose*                | 3590.08 | 361 | GL-sciences library and STD          |
| 26          | Melibiose                  | 2949.63 | 361 | GL-sciences library                  |
| 27          | Oxalacetic acid+Pyruvate   | 1050.55 | 174 | GL-sciences library                  |
| 28          | Phosphate                  | 1281.72 | 299 | GL-sciences library and NIST11       |
| 29          | Proline                    | 1305.97 | 142 | GL-sciences library and NIST11       |
| 30          | Psicose+Tagatose           | 1905.13 | 103 | GL-sciences library and NIST11       |
| 31          | Pyroglutamic acid          | 1534.04 | 156 | GL-sciences library                  |
| 32          | Quinic acid                | 1890.39 | 345 | GL-sciences library and STD          |
| 33          | Raffinose                  | 3499.49 | 361 | GL-sciences library                  |
| 34          | Rhamnose                   | 1744.43 | 117 | GL-sciences library and NIST11       |
| 35          | Ribitol                    | 1751.91 | 217 | GL-sciences library, NIST11, and STD |
| 36          | Serine                     | 1369.89 | 204 | GL-sciences library and NIST11       |
| 37          | Sorbitol                   | 1975.10 | 319 | GL-sciences library and NIST11       |
| 38          | Spermidine*                | 2284.89 | 368 | GL-sciences library                  |
| 39          | Sucrose                    | 2708.22 | 362 | GL-sciences library and NIST11       |
| 40          | Threonic acid              | 1576.48 | 292 | GL-sciences library and NIST11       |
| 41          | Trehalose                  | 2815.30 | 361 | GL-sciences library                  |
| 42          | Turanose                   | 2830.75 | 217 | GL-sciences library                  |
| 43          | Tyrosine                   | 1958.97 | 218 | GL-sciences library                  |
| 44          | Valine                     | 1223.06 | 144 | GL-sciences library and NIST11       |
| 45          | Xylonic acid               | 1802.68 | 103 | GL-sciences library                  |
| 46          | Xylose+Lyxose              | 1671.96 | 103 | GL-sciences library                  |
| 47          | Xylose                     | 1678.61 | 103 | GL-sciences library and NIST11       |
| <b>Peel</b> |                            |         |     |                                      |

| No | Metabolite                   | RI*     | Quantitative m/z | Annotation                           |
|----|------------------------------|---------|------------------|--------------------------------------|
| 1  | 1,6-Anhydroglucose*          | 1726.19 | 204              | GL-sciences library                  |
| 2  | 2-Aminoethanol               | 1275.80 | 174              | GL-sciences library and NIST11       |
| 3  | 2-Hydroxypyridine            | 1038.98 | 152              | GL-sciences library and NIST11       |
| 4  | 4-Aminobutyric acid          | 1541.83 | 174              | GL-sciences library and NIST11       |
| 5  | $\alpha$ -Ketoglutaric acid* | 1583.58 | 147              | GL-sciences library                  |
| 6  | Alanine                      | 1371.86 | 188              | GL-sciences library and NIST11       |
| 7  | Allose+Mannose               | 1936.41 | 273              | GL-sciences library and NIST11       |
| 8  | Arabionose                   | 1685.53 | 103              | GL-sciences library and NIST11       |
| 9  | Aspartic acid                | 1531.03 | 232              | GL-sciences library                  |
| 10 | $\beta$ -Lactose             | 2774.12 | 204              | GL-sciences library and NIST11       |
| 11 | Fructose 6-phosphate         | 2371.23 | 387              | GL-sciences library                  |
| 12 | Fructose                     | 1915.69 | 103              | GL-sciences library and NIST11       |
| 13 | Galactinol                   | 3075.95 | 204              | GL-sciences library                  |
| 14 | Galactose                    | 1927.53 | 319              | GL-sciences library, NIST11, and STD |
| 15 | Galactose+Glucose            | 1953.92 | 319              | GL-sciences library                  |
| 16 | Gentiobiose                  | 2889.44 | 204              | GL-sciences library and NIST11       |
| 17 | Glucarate                    | 2059.65 | 333              | GL-sciences library and NIST11       |
| 18 | Gluconic acid                | 2003.61 | 147              | GL-sciences library                  |
| 19 | Glucose                      | 1934.39 | 319              | GL-sciences library, NIST11, and STD |
| 20 | Glutamic acid                | 1629.56 | 246              | GL-sciences library and NIST11       |
| 21 | Glyceric acid                | 1340.31 | 189              | GL-sciences library                  |
| 22 | Glycine                      | 1316.38 | 147              | GL-sciences library and NIST11       |
| 23 | Inositol                     | 2132.77 | 217              | GL-sciences library, NIST11, and STD |
| 24 | Isocitric acid+Citric acid   | 1840.73 | 273              | GL-sciences library and NIST11       |
| 25 | Isoleucine                   | 1301.68 | 158              | GL-sciences library and NIST11       |
| 26 | Lyxose                       | 1679.11 | 103              | GL-sciences library and NIST11       |
| 27 | Malic acid                   | 1498.09 | 147              | GL-sciences library and NIST11       |
| 28 | Maltitol                     | 2937.58 | 204              | GL-sciences library                  |
| 29 | Maltose                      | 2853.17 | 319              | GL-sciences library and NIST11       |
| 30 | Mannitol                     | 1967.98 | 319              | GL-sciences library and NIST11       |
| 31 | Mannose*                     | 1920.82 | 160              | GL-sciences library, NIST11, and STD |
| 32 | Melibiose                    | 2950.27 | 361              | GL-sciences library                  |
| 33 | Meso erythritol              | 1523.84 | 217              | GL-sciences library                  |
| 34 | Oxalacetic acid+Pyruvate     | 1051.11 | 174              | GL-sciences library                  |
| 35 | Phenylalanine                | 1642.55 | 218              | GL-sciences library and NIST11       |

|    |                   |         |     |                                      |
|----|-------------------|---------|-----|--------------------------------------|
| 36 | Phosphate         | 1282.15 | 299 | GL-sciences library and NIST11       |
| 37 | Pyroglutamic acid | 1534.56 | 156 | GL-sciences library                  |
| 38 | Quinic acid       | 1890.97 | 345 | GL-sciences library                  |
| 39 | Raffinose         | 3500.43 | 361 | GL-sciences library                  |
| 40 | Rhamnose          | 1744.97 | 117 | GL-sciences library and NIST11       |
| 41 | Ribitol           | 1752.38 | 217 | GL-sciences library, NIST11, and STD |
| 42 | Ribose            | 1700.52 | 103 | GL-sciences library                  |
| 43 | Serine            | 1370.24 | 204 | GL-sciences library and NIST11       |
| 44 | Sinapinic acid*   | 2256.58 | 368 | GL-sciences library                  |
| 45 | Sorbitol          | 1975.97 | 147 | GL-sciences library and NIST11       |
| 46 | Sorbose*          | 1905.65 | 103 | GL-sciences library and NIST11       |
| 47 | Sucrose           | 2707.94 | 362 | GL-sciences library and NIST11       |
| 48 | Threonic acid     | 1577.04 | 147 | GL-sciences library and NIST11       |
| 49 | Threonine         | 1398.00 | 218 | GL-sciences library and NIST11       |
| 50 | Trehalose         | 2815.29 | 361 | GL-sciences library                  |
| 51 | Tyrosine          | 1958.86 | 218 | GL-sciences library                  |
| 52 | Valine            | 1223.59 | 144 | GL-sciences library and NIST11       |
| 53 | Xylonic acid      | 1782.37 | 103 | GL-sciences library                  |
| 54 | Xylose+Lyxose     | 1672.39 | 103 | GL-sciences library                  |

\*Retention indices (RI) were calculated using standard alkane mixture (C<sub>10</sub>-C<sub>40</sub>).

Peak annotation was as follows:

- Comparison of the retention indices (RI) and their mass spectra with GL-science library,
- 80% upwards matching to NIST11 library
- Co-injection with authentic standard by spiking into extracted samples.

**Table S4.** Metabolites with VIP score (more than 1) and its coefficients

| Flesh |                          |           |              | Peel |                     |           |              |
|-------|--------------------------|-----------|--------------|------|---------------------|-----------|--------------|
| No    | Metabolite               | VIP Score | Coefficients | No   | Metabolite          | VIP Score | Coefficients |
| 1     | Melezitose               | 1.805     | 0.086        | 1    | Inositol            | 1.858     | -0.088       |
| 2     | Inositol                 | 1.784     | -0.085       | 2    | Mannose             | 1.712     | -0.066       |
| 3     | Xylonic acid             | 1.736     | 0.075        | 3    | Galactose           | 1.700     | -0.053       |
| 4     | Gluconic acid            | 1.689     | 0.069        | 4    | Sucrose             | 1.661     | 0.079        |
| 5     | Raffinose                | 1.687     | -0.070       | 5    | Aspartic acid       | 1.627     | -0.066       |
| 6     | Threonic acid            | 1.617     | 0.090        | 6    | Galactose+Glucose   | 1.596     | -0.065       |
| 7     | $\beta$ -Lactose         | 1.553     | -0.076       | 7    | 1,6-Anhydroglucose  | 1.535     | 0.071        |
| 8     | Quinic acid              | 1.457     | -0.058       | 8    | Tyrosine            | 1.423     | -0.044       |
| 9     | Oxalacetic acid+Pyruvate | 1.378     | -0.054       | 9    | Allose+Mannose      | 1.377     | -0.036       |
| 10    | Melibiose                | 1.373     | 0.042        | 10   | Melibiose           | 1.360     | -0.050       |
| 11    | Malic acid               | 1.248     | -0.057       | 11   | 4-Aminobutyric acid | 1.294     | -0.036       |
| 12    | Galactose                | 1.241     | -0.048       | 12   | Glucose             | 1.292     | -0.023       |
| 13    | Maltose                  | 1.203     | 0.033        | 13   | Pyroglutamic acid   | 1.267     | -0.031       |
| 14    | Turanose                 | 1.200     | 0.046        | 14   | Meso erythritol     | 1.247     | 0.036        |
| 15    | Galacturonic acid        | 1.145     | -0.106       | 15   | Raffinose           | 1.230     | -0.025       |
| 16    | 2-Aminoethanol           | 1.019     | 0.013        | 16   | Galactinol          | 1.216     | -0.043       |
| 17    | Gentiobiose              | 1.004     | 0.058        | 17   | Fructose            | 1.215     | -0.027       |
|       |                          |           |              | 18   | Quinic acid         | 1.205     | -0.055       |
|       |                          |           |              | 19   | Xylose+Lyxose       | 1.198     | 0.090        |
|       |                          |           |              | 20   | Lyxose              | 1.196     | 0.015        |
|       |                          |           |              | 21   | Glutamic acid       | 1.155     | -0.043       |
|       |                          |           |              | 22   | Threonic acid       | 1.067     | -0.034       |
|       |                          |           |              | 23   | Gentiobiose         | 1.032     | 0.038        |
|       |                          |           |              | 24   | Glucarate           | 1.004     | -0.041       |

Figure S1. Visual experimental design on pineapple ripening study in this manuscript

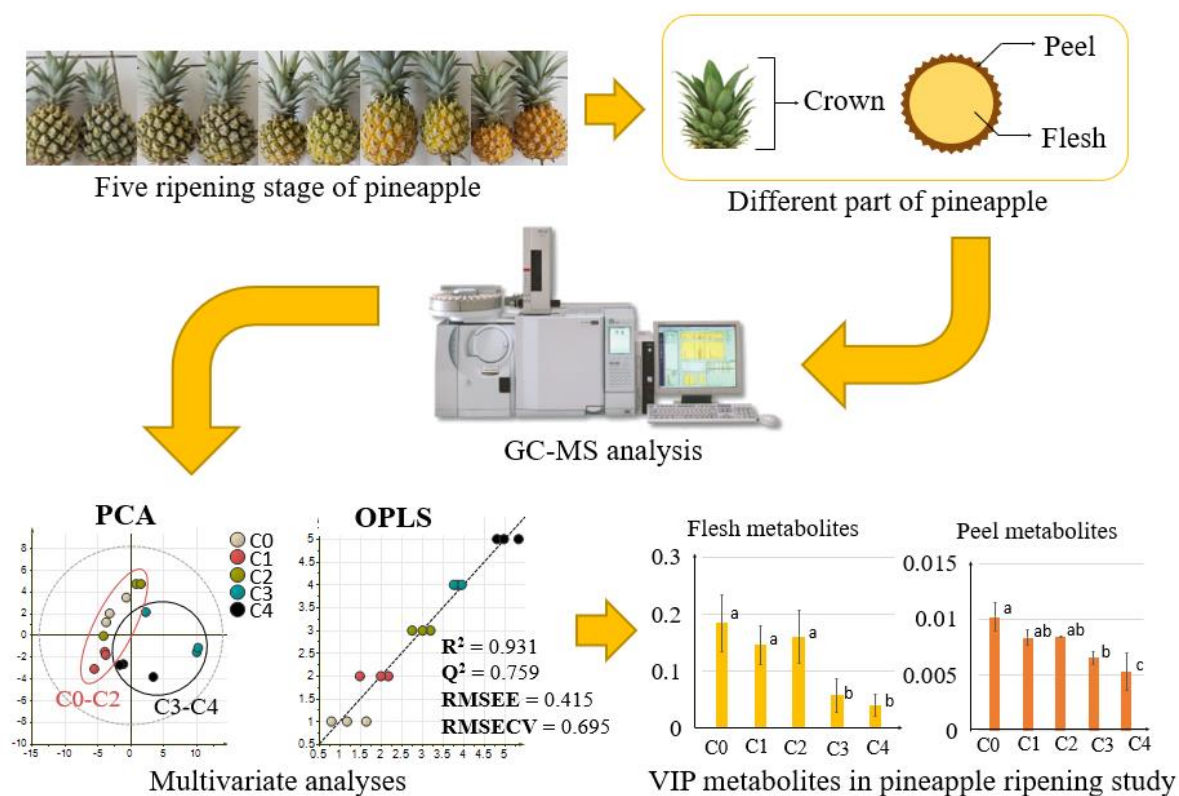

Figure S2. Venn diagram of annotated metabolites in crown, flesh, and peel part on different parts analysis

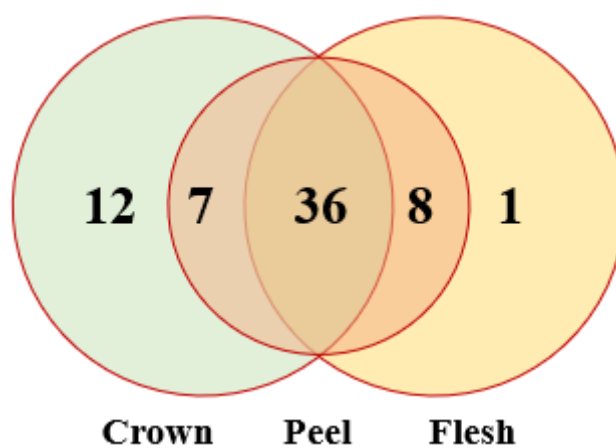

Figure S3. Venn diagram of annotated metabolites in crown, flesh, and peel part on pineapple ripening analysis

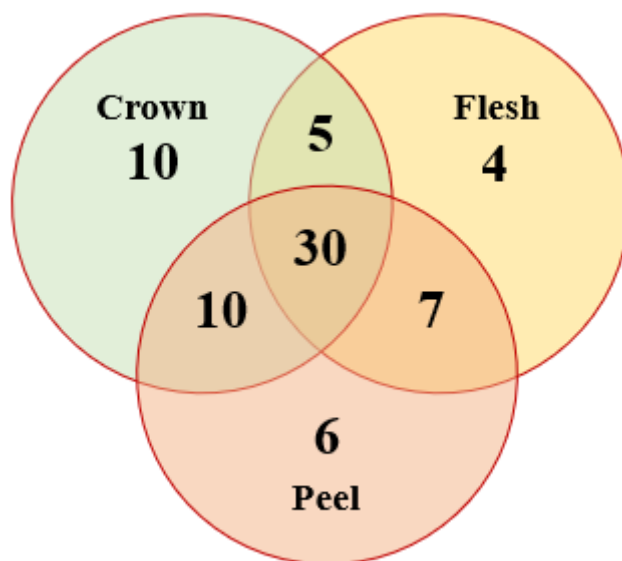

Supplement: metabolites-10-00134-s001.pdf [file metabolites-10-00134-s001.pdf]
